# Supplementary material for: Hemocyanin Modification of Chitosan Scaffolds with Calcium Phosphate Phases Increase the Osteoblast/Osteoclast Activity Ratio—A Co-Culture Study
Source: MDPI journal article supplement (doi:10.3390/molecules25194580), 2020-10-07
Supplement: s1 [file s1]

Supplementary

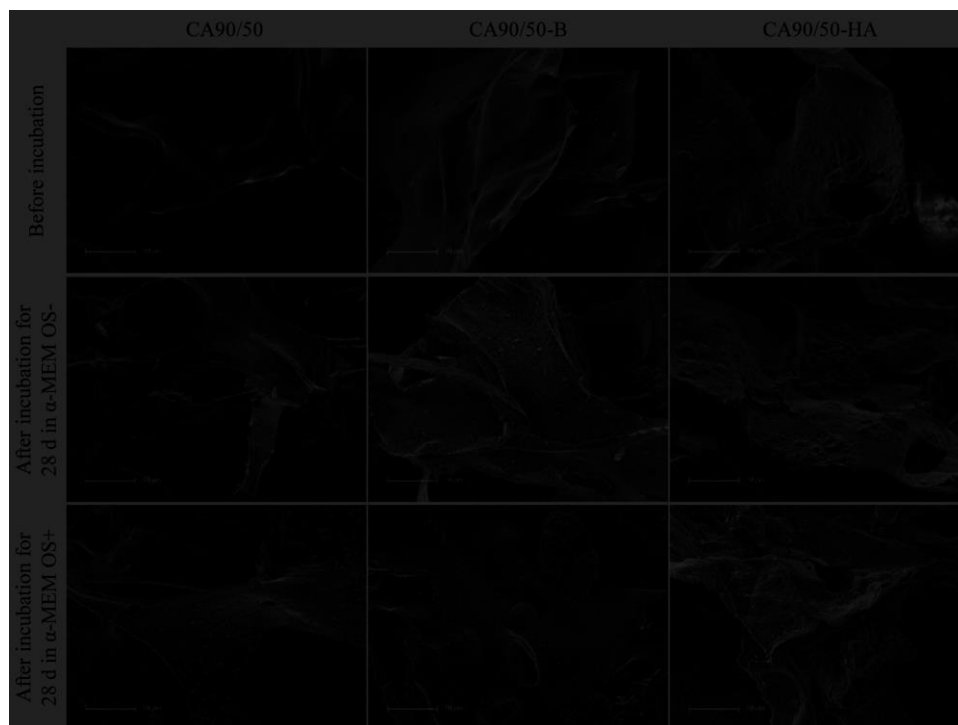

Figure S1 Scanning electron micrographs of plain as well as brushite and hydroxyapatite modified chitosan scaffolds, respectively. Secondary electron images were taken at 3 keV with an XL30ESEM-FEG (FEI).
